# Supplementary material for: IPT9, a cis-zeatin cytokinin biosynthesis gene, promotes root growth
Source: PubMed Central journal article supplement (PMC9616112; doi:10.3389/fpls.2022.932008), 2022-10-14
Supplement: Table_1.pdf [file Table_1.pdf]

**Table S1.** Primer sets used in this work

| Purpose    | Primer name | Primer sequence (5' → 3')                             |                                                       |
|------------|-------------|-------------------------------------------------------|-------------------------------------------------------|
|            |             | Forward primer (F)                                    | Reverse primer (R)                                    |
| Genotyping | KG7770      | CTAAGCGACTCAATGGCGAAATCATCAG                          | CAGCGATAACTTCTGGAGAAGGTTTAG                           |
|            | KG7770_LB   | GTAATTCCTTAATTCTCCGCTCATGATC                          |                                                       |
|            | GK_302_F10  | TTGTTTTGGTTTTGGTTTTGG                                 | AGCTGTTAATTTGGCAGCATG                                 |
|            | LBpAC161    | ATATTGACCATCATACTCATTGC                               |                                                       |
| Cloning    | attB_IPT9   | GGGGACAAGTTTGTACAAAAAAGCAGGCTA<br>TGGTGATTGGCAGTGGCGT | GGGGACCACTTTGTACAAGAAAGCTG<br>GGTTGCTATTGCGCTTCCACGCA |
|            | pDONR207    | TCGCGTTAACGCTAGCATGGATCT                              | TAACATCAGAGATTTTGAGACAC                               |
|            | pMDC32      | TCATTCATTTGGAGAGGACCT                                 | TAACATAGATGACACCGCGC                                  |
|            | IPT9_cds    |                                                       | CTGTCTGTACCCAATGGCACGA                                |
| qPCR       | oMP080      | GGATTGTATCTGCGATGGTTTATGT                             |                                                       |
|            | oMP081      |                                                       | CATGGGCCTCAGCGATAACT                                  |
