# Supplementary material for: IPT9, a cis-zeatin cytokinin biosynthesis gene, promotes root growth
Source: PubMed Central journal article supplement (PMC9616112; doi:10.3389/fpls.2022.932008), 2022-10-14
Supplement: Table_2.pdf [file Table_2.pdf]

**Supplemental Table 2.** Multiple statistical comparisons between genotypes shown in Figure 3

| Day 4               |                  |                   |                  |                  | Day 9               |                  |                   |                  |                  |
|---------------------|------------------|-------------------|------------------|------------------|---------------------|------------------|-------------------|------------------|------------------|
| Scion/<br>rootstock | Col-0 /<br>Col-0 | ipt2-9 /<br>ipt29 | ipt29 /<br>Col-0 | Col-0 /<br>ipt29 | Scion/<br>rootstock | Col-0 /<br>Col-0 | ipt2-9 /<br>ipt29 | ipt29 /<br>Col-0 | Col-0 /<br>ipt29 |
| Col-0 /<br>Col-0    |                  | **                | ns               | **               | Col-0 /<br>Col-0    |                  | ****              | *                | ****             |
| ipt2-9 /<br>ipt29   |                  |                   | ****             | ****             | ipt2-9 /<br>ipt29   |                  |                   | ****             | ****             |
| ipt29 /<br>Col-0    |                  |                   |                  | ***              | ipt29 /<br>Col-0    |                  |                   |                  | ****             |
| Col-0 /<br>ipt29    |                  |                   |                  |                  | Col-0 /<br>ipt29    |                  |                   |                  |                  |
| Day 5               |                  |                   |                  |                  | Day 10              |                  |                   |                  |                  |
| Scion/<br>rootstock | Col-0 /<br>Col-0 | ipt2-9 /<br>ipt29 | ipt29 /<br>Col-0 | Col-0 /<br>ipt29 | Scion/<br>rootstock | Col-0 /<br>Col-0 | ipt2-9 /<br>ipt29 | ipt29 /<br>Col-0 | Col-0 /<br>ipt29 |
| Col-0 /<br>Col-0    |                  | **                | ns               | **               | Col-0 /<br>Col-0    |                  | ***               | **               | ****             |
| ipt2-9 /<br>ipt29   |                  |                   | ****             | **               | ipt2-9 /<br>ipt29   |                  |                   | ****             | ns               |
| ipt29 /<br>Col-0    |                  |                   |                  | ****             | ipt29 /<br>Col-0    |                  |                   |                  | ****             |
| Col-0 /<br>ipt29    |                  |                   |                  |                  | Col-0 /<br>ipt29    |                  |                   |                  |                  |
| Day 6               |                  |                   |                  |                  | Day 11              |                  |                   |                  |                  |
| Scion/<br>rootstock | Col-0 /<br>Col-0 | ipt2-9 /<br>ipt29 | ipt29 /<br>Col-0 | Col-0 /<br>ipt29 | Scion/<br>rootstock | Col-0 /<br>Col-0 | ipt2-9 /<br>ipt29 | ipt29 /<br>Col-0 | Col-0 /<br>ipt29 |
| Col-0 /<br>Col-0    |                  | **                | ns               | **               | Col-0 /<br>Col-0    |                  | ***               | *                | ****             |
| ipt2-9 /<br>ipt29   |                  |                   | ****             | *                | ipt2-9 /<br>ipt29   |                  |                   | ****             | ns               |
| ipt29 /<br>Col-0    |                  |                   |                  | ****             | ipt29 /<br>Col-0    |                  |                   |                  | ****             |
| Col-0 /<br>ipt29    |                  |                   |                  |                  | Col-0 /<br>ipt29    |                  |                   |                  |                  |
| Day 7               |                  |                   |                  |                  | Day 12              |                  |                   |                  |                  |
| Scion/<br>rootstock | Col-0 /<br>Col-0 | ipt2-9 /<br>ipt29 | ipt29 /<br>Col-0 | Col-0 /<br>ipt29 | Scion/<br>rootstock | Col-0 /<br>Col-0 | ipt2-9 /<br>ipt29 | ipt29 /<br>Col-0 | Col-0 /<br>ipt29 |
| Col-0 /<br>Col-0    |                  | ****              | **               | ****             | Col-0 /<br>Col-0    |                  | ****              | ***              | ****             |
| ipt2-9 /<br>ipt29   |                  |                   | ****             | ****             | ipt2-9 /<br>ipt29   |                  |                   | ****             | ns               |
| ipt29 /<br>Col-0    |                  |                   |                  | ****             | ipt29 /<br>Col-0    |                  |                   |                  | ****             |
| Col-0 /<br>ipt29    |                  |                   |                  |                  | Col-0 /<br>ipt29    |                  |                   |                  |                  |
| Day 8               |                  |                   |                  |                  | Day 13              |                  |                   |                  |                  |
| Scion/<br>rootstock | Col-0 /<br>Col-0 | ipt2-9 /<br>ipt29 | ipt29 /<br>Col-0 | Col-0 /<br>ipt29 | Scion/<br>rootstock | Col-0 /<br>Col-0 | ipt2-9 /<br>ipt29 | ipt29 /<br>Col-0 | Col-0 /<br>ipt29 |
| Col-0 /<br>Col-0    |                  | ****              | *                | ****             | Col-0 /<br>Col-0    |                  | ****              | ns               | ****             |
| ipt2-9 /<br>ipt29   |                  |                   | ****             | ****             | ipt2-9 /<br>ipt29   |                  |                   | ****             | *                |
| ipt29 /<br>Col-0    |                  |                   |                  | ****             | ipt29 /<br>Col-0    |                  |                   |                  | ****             |
| Col-0 /<br>ipt29    |                  |                   |                  |                  | Col-0 /<br>ipt29    |                  |                   |                  |                  |

Asterisks indicate values significantly different in a Student's *t* test (\**p* < 0.05, \*\**p* < 0.01, \*\*\**p* < 0.001, \*\*\*\**p* < 0.0001).
